# Supplementary material for: PDX models of human lung squamous cell carcinoma: consideration of factors in preclinical and co-clinical applications
Source: PubMed Central journal article supplement (PMC7409653; doi:10.1186/s12967-020-02473-y), 2020-08-06
Supplement: 12967_2020_2473_MOESM1_ESM.pdf [file 12967_2020_2473_MOESM1_ESM.pdf]

Supplemental Table 1. The clinical characteristics of LUSC patients

|                               | N=139       |
|-------------------------------|-------------|
| Age (years)                   |             |
| Average                       | 66 (39- 82) |
| Gender                        |             |
| Male                          | 133         |
| Female                        | 6           |
| Smoking status                |             |
| Former or current             | 137         |
| Never                         | 2           |
| Preoperative Chemotherapy     |             |
| Yes                           | 16          |
| No                            | 123         |
| pTNM stage (7 <sup>th</sup> ) |             |
| I                             | 46          |
| II                            | 54          |
| III                           | 37          |
| IV                            | 2           |
| Tumor size                    |             |
| <3cm                          | 38          |
| 3<<5                          | 48          |
| 5<<7                          | 43          |
| 7>                            | 10          |
| Differentiation               |             |
| Well                          | 2           |
| Moderate                      | 105         |
| Poor                          | 31          |
| Recurrence                    |             |
| Yes                           | 28          |
| No                            | 111         |
| Vascular invasion             |             |
| Yes                           | 16          |
| No                            | 123         |
| Perineural invasion           |             |
| Yes                           | 14          |
| No                            | 125         |
| Lymphatic invasion            |             |
| Yes                           | 43          |
| No                            | 96          |
| Visceral pleural invasion     |             |
| PL0                           | 107         |
| PL1                           | 3           |
| PL2                           | 12          |
| PL3                           | 15          |
