# Supplementary material for: PDX models of human lung squamous cell carcinoma: consideration of factors in preclinical and co-clinical applications
Source: PubMed Central journal article supplement (PMC7409653; doi:10.1186/s12967-020-02473-y), 2020-08-06
Supplement: 12967_2020_2473_MOESM2_ESM.pdf [file 12967_2020_2473_MOESM2_ESM.pdf]

Supplemental Table 2. Primary antibodies used in the study.

| <b>Antibody</b> | <b>Vendor</b> | <b>Cat. no</b> | <b>Dilution</b> |
|-----------------|---------------|----------------|-----------------|
| CK5             | Novocastra    | XM26           | 1:50            |
| p63             | Dako          | M7317          | 1:300           |
| TTF-1           | Dako          | M3575          | 1:50            |
| Pan-cytokeratin | Dako          | M3515          | 1:50            |
| CD105           | Santa Cruz    | sc 376381      | 1:100           |
