# Supplementary material for: PDX models of human lung squamous cell carcinoma: consideration of factors in preclinical and co-clinical applications
Source: PubMed Central journal article supplement (PMC7409653; doi:10.1186/s12967-020-02473-y), 2020-08-06
Supplement: 12967_2020_2473_MOESM3_ESM.pdf [file 12967_2020_2473_MOESM3_ESM.pdf]

Supplemental Table 3. Clinical characteristics between XALD and successful PDX engraftment

| N=78                          | Growth       |             | p-value |
|-------------------------------|--------------|-------------|---------|
|                               | Success (62) | XALD (15)   |         |
| Age(years)                    |              |             |         |
| Mean                          | 66.4±6.8     | 65.0±11.2   | 0.634   |
| Gender                        |              |             |         |
| Male                          | 60 (96.8%)   | 16 (100.0%) | 1.000   |
| Female                        | 2 (3.2%)     | 0 (0.0%)    |         |
| Smoking status                |              |             |         |
| Former or current             | 61 (98.4%)   | 16 (100.0%) | 1.000   |
| Never                         | 1 (1.6%)     | 0 (0.0%)    |         |
| Preoperative<br>Chemotherapy  |              |             |         |
| Yes                           | 3 (4.8%)     | 2 (12.5%)   | 0.271   |
| No                            | 59 (95.2%)   | 14 (87.5%)  |         |
| pTNM stage (7 <sup>th</sup> ) |              |             |         |
| I                             | 18 (29.0%)   | 7 (43.8%)   | 0.334   |
| II                            | 29 (46.8%)   | 5 (31.3%)   |         |
| III                           | 14 (22.6%)   | 3 (18.8%)   |         |
| IV                            | 1 (1.6%)     | 1 (6.3%)    |         |
| Tumor size                    |              |             |         |
| <3cm                          | 13 (21.0%)   | 4 (25.0%)   | 0.601   |
| 3< <5                         | 21 (33.9%)   | 7 (43.8%)   |         |
| 5< <7                         | 21 (33.9%)   | 5 (31.3%)   |         |
| 7<                            | 7 (11.3%)    | 0 (0.0%)    |         |
| Differentiation               |              |             |         |
| Well                          | 1 (1.6)      | 0 (0.0%)    | 1.000   |
| Moderate                      | 47 (75.8)    | 12 (75.0%)  |         |
| Poor                          | 14 (22.6)    | 4 (25.0%)   |         |
| Recurrence                    |              |             |         |
| Yes                           | 14 (22.6%)   | 3 (18.8%)   | 1.000   |
| No                            | 48 (77.4%)   | 13 (81.3%)  |         |
