# Supplementary material for: PDX models of human lung squamous cell carcinoma: consideration of factors in preclinical and co-clinical applications
Source: PubMed Central journal article supplement (PMC7409653; doi:10.1186/s12967-020-02473-y), 2020-08-06
Supplement: 12967_2020_2473_MOESM4_ESM.pdf [file 12967_2020_2473_MOESM4_ESM.pdf]

Supplemental Table 4. The frequency of somatic mutations in LUSC patients and PDX models

| ID      | LUSC patient |           |           | LUSC PDX models |          |           |
|---------|--------------|-----------|-----------|-----------------|----------|-----------|
|         | Gene         | Mutation  | Frequency | Gene            | Mutation | Frequency |
| DP_032  | TP53         | H179R     | 0.478261  | TP53            | H179R    | 1         |
|         | PTEN         | A148fs    | 0.371681  | PTEN            | A148fs   | 0.454936  |
|         | EP300        | C1247Y    | 0.0406504 | CDKN2A          | R52W     | 0.5       |
| DP_040  | HRAS         | G13V      | 0.388889  | HRAS            | G13V     | 1         |
|         | TP53         | Y236C     | 0.395349  | TP53            | Y236C    | 1         |
|         | PTEN         | -78fs     | 0.44      | PTEN            | -78fs    | 0.488095  |
|         |              |           |           | GNAQ            | T96S     | 0.142857  |
|         |              |           |           | GNAQ            | M59L     | 0.08      |
|         |              |           | U2AF1     | G167C           | 0.08     |           |
| DP_041  | MST1R        | S802P     | 0.0568182 | CTNNA2          | M672I    | 0.277778  |
|         |              |           |           | FRG1            | C159Y    | 0.0419255 |
| DP_043  |              |           |           | OBSCN           | D3833Y   | 0.14486   |
|         |              |           |           | NFE2L2          | D13H     | 0.508475  |
|         |              |           |           | TP53            | S215I    | 0.947368  |
| DP_085  | DDR2         | Q365K     | 0.235294  | DDR2            | Q365K    | 0.540984  |
|         | BRAF         | Y472C     | 0.165354  | BRAF            | Y472C    | 0.527273  |
|         | BRAF         | R146W     | 0.176923  | BRAF            | R146W    | 0.441718  |
|         | NF1          | W837R     | 0.287879  | NF1             | W837R    | 1         |
|         | MUC16        | G6037R    | 0.268398  | MUC16           | G6037R   | 0.989529  |
|         | MUC16        | Q5473H    | 0.236715  | MUC16           | Q5473H   | 0.987342  |
|         | GNAS         | T225S     | 0.185185  | GNAS            | T225S    | 0.309524  |
| DP_-089 | EP300        | p.G438V   | 0.352381  | EP300           | G438V    | 0.478873  |
|         | AMER1        | p.R142K   | 0.326531  | AMER1           | R142K    | 0.851064  |
|         | RB1          | p.I425fs  | 0.426667  | RB1             | I425fs   | 0.471947  |
|         |              |           |           | IGF2R           | D1389A   | 0.397959  |
| DP_091  | CTNNA2       | R136H     | 0.5       | CTNNA2          | R136H    | 0.578947  |
|         | CTNNA2       | L872M     | 0.582278  | CTNNA2          | L872M    | 0.557047  |
|         | ERBB4        | I119V     | 0.245902  | ERBB4           | I119V    | 0.25      |
|         | SOX2         | M4I       | 0.5       | SOX2            | M4I      | 0.9       |
|         | PDGFRA       | N471S     | 0.438596  | PDGFRA          | N471S    | 0.438596  |
|         | JAK2         | R1127S    | 0.823529  | JAK2            | R1127S   | 0.823529  |
|         | GNAS         | P707T     | 0.409091  | GNAS            | P707T    | 0.392857  |
|         | NF1          | S1524fs   | 0.472678  | NF1             | S1524fs  | 0.47191   |
|         | EYS          | S658R     | 0.850394  | EYS             | S658R    | 1         |
|         | MUC16        | S10327F   | 0.788462  | MUC16           | S10327F  | 0.990654  |
|         | MUC16        | G6924W    | 0.815249  | MUC16           | G6924W   | 0.97493   |
|         | MUC16        | H3782Q    | 0.870504  | MUC16           | H3782Q   | 0.981707  |
|         | MUC16        | G274V     | 0.818966  | MUC16           | G274V    | 1         |
|         | MUC16        | V2144F    | 0.813084  | MUC16           | V2144F   | 0.966667  |
|         | OBSCN        | G3952V    | 0.41573   | OBSCN           | R2985L   | 0.0666667 |
| MUC16   | S8133R       | 0.0362319 | OBSCN     | G3952V          | 0.366071 |           |
|         | ALK          | H344Y     | 0.118012  | ALK             | H344Y    | 0.606838  |
|         | ATR          | Q1293P    | 0.0547945 | ATR             | Q1293P   | 0.192118  |
|         | PIK3CA       | R88Q      | 0.111111  | PIK3CA          | R88Q     | 0.237226  |
