# Supplementary material for: PDX models of human lung squamous cell carcinoma: consideration of factors in preclinical and co-clinical applications
Source: PubMed Central journal article supplement (PMC7409653; doi:10.1186/s12967-020-02473-y), 2020-08-06

Supplemental Figure 1. Rate of successful engraftment along the LUSC PDX passages

### Rate of successful engraftment along the LUSC PDX passages (%)

$$\text{Success Ratio} = \frac{\text{Number of successful engraftments}}{\text{Number of tried engraftments}}$$

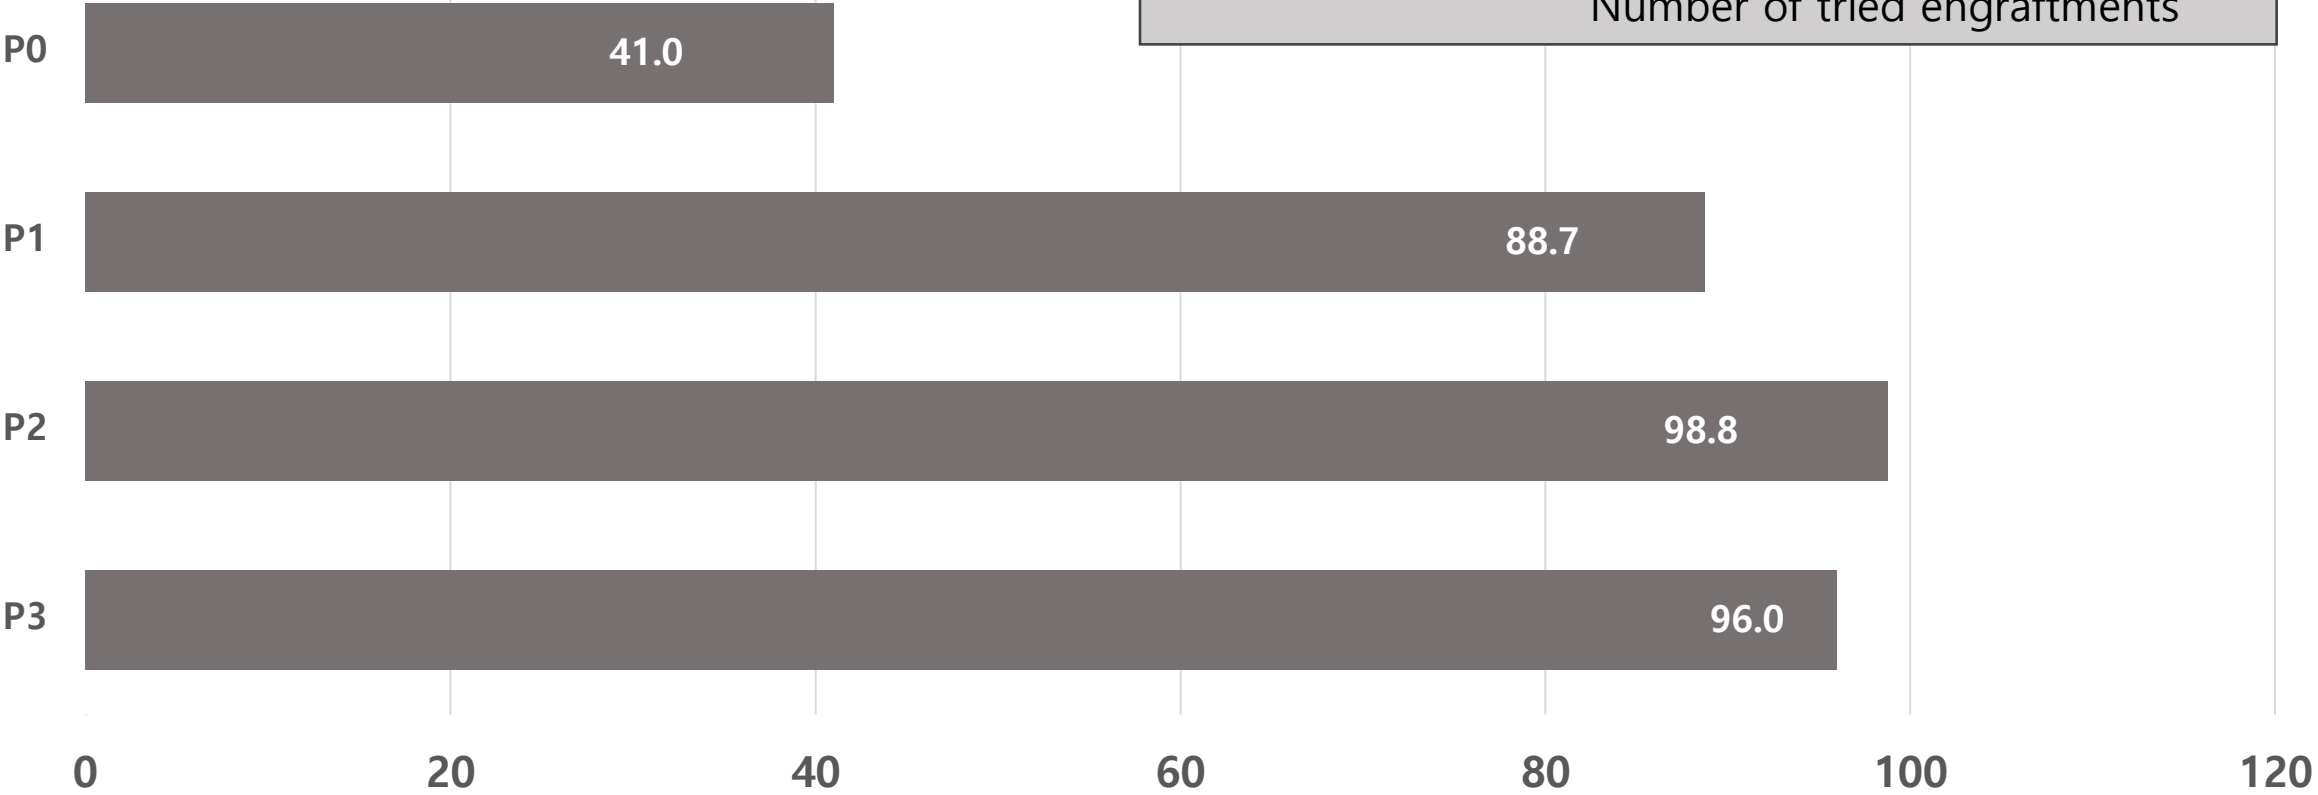

Supplement: 12967_2020_2473_MOESM6_ESM.pdf [file 12967_2020_2473_MOESM6_ESM.pdf]
